# Supplementary material
Source: Springer Nature journal article supplement (https://www.springermedizin.de/resource/supplementary/12933_2011_413_MOESM2_ESM.pdf/9538126)

**CD34/45<sup>+</sup> BM-CPCs ( $1 \times 10^6$  WBCs)**

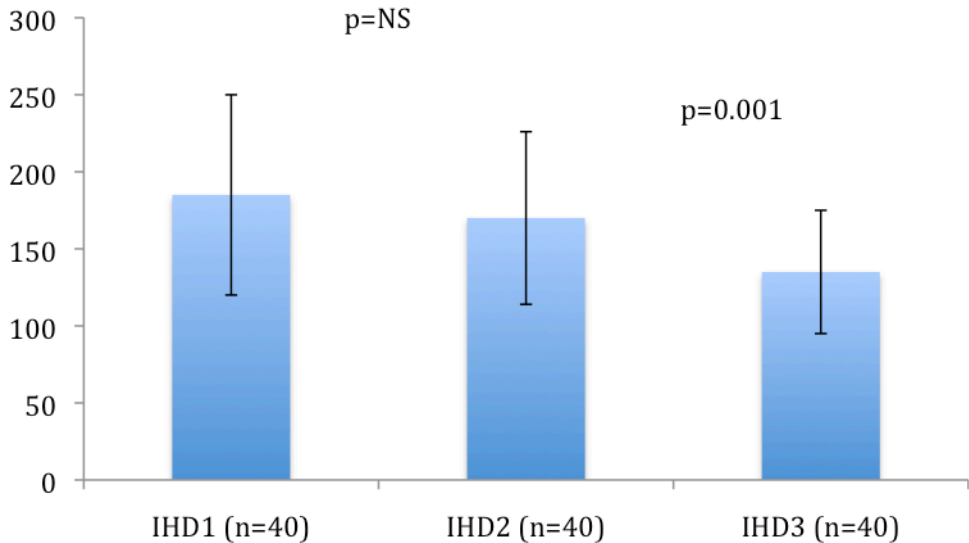

Supplement: MOESM2 [file 9538126]
